# Supplementary material
Source: Research Square preprint supplement (doi:10.21203/rs.3.rs-10440130/v1)
Supplement: Supplementary file 2 [file bf276c6f3a57604bf25a6a8b.docx]

# 11. Supplementary Material

## Clinical Intervention Protocol

### A Longitudinal Feeding Development Intervention Framework for Children with Autism Spectrum Disorder

## Supplementary Methods

### Intervention Protocol

The intervention described in this case report was developed according to a developmental, occupation-centered, and family-centered framework. Rather than focusing exclusively on increasing food acceptance, the intervention prioritized the progressive development of sensory, behavioral, motor, emotional, and occupational competencies that support adaptive feeding participation.

The protocol was individualized throughout treatment according to continuous clinical assessment. Nevertheless, all intervention components followed the same developmental sequence described below.

# Phase I

## Sensory Regulation and Therapeutic Engagement

### Primary Objective

To establish emotional safety and physiological regulation during feeding-related activities.

### Clinical Goals

• Reduce anticipatory distress.

• Increase tolerance for the presence of foods.

• Build therapeutic rapport.

• Improve emotional regulation.

• Establish predictable mealtime routines.

### Therapeutic Strategies

- Child-led interaction
- Play-based engagement
- Visual schedules
- Sensory regulation activities
- Environmental adaptations
- Parent education
- Elimination of coercive feeding practices
- Positive therapeutic routines

### Progress Indicators

✓ Remains seated during activities

✓ Reduced escape behaviors

✓ Reduced emotional dysregulation

✓ Increased tolerance toward food proximity

✓ Positive participation during sessions

# Phase II

## Food Exploration

### Primary Objective

To promote multisensory interaction with foods without expectations of eating.

### Clinical Goals

• Increase food familiarity.

• Promote sensory exploration.

• Improve curiosity.

• Reduce food avoidance.

### Therapeutic Strategies

- Visual exploration
- Olfactory exploration
- Tactile exploration
- Food manipulation
- Symbolic play
- Food categorization
- Kitchen participation
- Food preparation
- Sensory discrimination activities

### Progress Indicators

✓ Looks at unfamiliar foods

✓ Touches foods voluntarily

✓ Manipulates multiple textures

✓ Smells foods spontaneously

✓ Participates in food preparation

✓ Demonstrates curiosity

# Phase III

## Food Acceptance

### Primary Objective

To facilitate progressive acceptance of novel foods through graded exposure and adaptive learning.

### Clinical Goals

• Expand food repertoire.

• Improve oral sensory tolerance.

• Increase chewing participation.

• Reduce food refusal.

### Therapeutic Strategies

- Graduated food hierarchy
- Behavioral shaping
- Positive reinforcement
- Food chaining
- Successive approximation
- Oral sensory experiences
- Shared meals
- Self-feeding opportunities

### Progress Indicators

✓ Brings food to mouth

✓ Tastes novel foods

✓ Accepts small portions

✓ Demonstrates improved chewing

✓ Reduced refusal behaviors

✓ Increased flexibility

# Phase IV

## Feeding Development and Generalization

### Primary Objective

To transfer feeding competencies to natural environments and promote sustainable participation.

### Clinical Goals

• Generalize feeding behaviors.

• Promote occupational participation.

• Increase family confidence.

• Improve adaptive functioning.

### Therapeutic Strategies

- Home routines
- School collaboration
- Family meals
- Community participation
- Restaurant exposure
- Caregiver coaching
- Environmental adaptation
- Longitudinal monitoring

### Progress Indicators

✓ Eats across multiple settings

✓ Participates during family meals

✓ Increased autonomy

✓ Flexible food choices

✓ Family confidence

✓ Functional participation

# Longitudinal Outcome Indicators

The following functional indicators were monitored throughout intervention.

| Domain | Clinical Indicator |
| --- | --- |
| Sensory Regulation | Emotional regulation during meals |
| Food Exploration | Voluntary interaction with foods |
| Food Acceptance | Acceptance of novel foods |
| Food Repertoire | Progressive expansion |
| Oral-Motor Skills | Functional chewing |
| Behavioral Flexibility | Reduced rigidity |
| Mealtime Participation | Participation during meals |
| Family Participation | Caregiver confidence |
| Occupational Performance | Functional feeding participation |
| Generalization | Home, school, community |

# Clinical Decision Rules

Progression between intervention phases was determined by functional readiness rather than chronological duration.

Advancement required demonstration of consistent behavioral stability and achievement of phase-specific functional indicators.

Regression to previous phases remained possible whenever sensory dysregulation or behavioral distress interfered with therapeutic participation.

Consequently, intervention progression followed developmental competence rather than predetermined treatment timelines.

# Core Clinical Principles

The following principles guided all intervention phases:

• Occupation-centered practice

• Child-centered intervention

• Family-centered care

• Sensory-informed clinical reasoning

• Respect for neurodevelopmental differences

• Positive behavioral support

• Developmentally appropriate progression

• Environmental adaptation

• Interdisciplinary collaboration

• Functional outcome measurement

# Supplementary Table S1

## Feeding Development Outcome Matrix

| Feeding Development Domain | Primary Outcome | Clinical Measure |
| --- | --- | --- |
| Sensory Regulation | Emotional stability | Clinical observation |
| Food Exploration | Curiosity | Therapist observation |
| Oral Interaction | Food manipulation | Functional performance |
| Food Acceptance | Novel foods accepted | Food hierarchy |
| Food Repertoire | Diversity | Parent report |
| Behavioral Flexibility | Adaptability | Clinical observation |
| Family Participation | Confidence | Caregiver interview |
| Occupational Participation | Functional eating | Occupational performance |

# Statement for the Supplementary Material

**The intervention protocol presented in this supplementary material reflects the clinical framework adopted throughout the longitudinal follow-up described in this case report. Although individualized according to the child's developmental profile, the protocol provides a structured and reproducible framework that may support clinical implementation and future research investigating multidimensional outcomes of feeding intervention in children with Autism Spectrum Disorder.**
